# Supplementary material for: Comprehensive evaluation of fusion transcript detection algorithms and a meta-caller to combine top performing methods in paired-end RNA-seq data
Source: PubMed Central journal article supplement — Nucleic Acids Res. 2015 Nov 17;44(5):e47. doi: 10.1093/nar/gkv1234 (PMC4797269; doi:10.1093/nar/gkv1234), 2015-11-17
Supplement: supp_gkv1234_Supplementary_Tables.pdf [file supp_gkv1234_Supplementary_Tables.pdf]

# Comprehensive evaluation of fusion transcript detection algorithms and a meta-caller to combine top performing methods in paired-end RNA-seq data

## Supplementary Tables

**Table S1.** Summary of computational tools published since 2010.

| <b>Tools</b>          | <b>Fusion point</b>          | <b>Platform</b> | <b>Published</b>                                                        |
|-----------------------|------------------------------|-----------------|-------------------------------------------------------------------------|
| <b>MapSplice</b>      | No restriction               | Illumina        | Wang et al., Nucleic Acids Res. (2010)                                  |
| <b>Trans-ABYSS</b>    | Canonical splicing pattern   | Illumina        | Robertson et al., Nat Methods. (2010)                                   |
| <b>FusionSeq</b>      | No restriction               | Illumina/SOLiD  | Sboner et al., Genome Biol. (2010)                                      |
| <b>ShortFuse</b>      | No restriction               | Illumina/SOLiD  | Kinsella et al., Bioinformatics. (2011)                                 |
| <b>Comrad</b>         | No restriction               | Illumina        | McPherson et al., Bioinformatics. (2011b)                               |
| <b>FusionHunter</b>   | Canonical splicing pattern   | Illumina/SOLiD  | Li et al., Bioinformatics. (2011)                                       |
| <b>FusionMap</b>      | Canonical splicing pattern   | Illumina        | Ge et al., Bioinformatics. (2011)                                       |
| <b>deFuse</b>         | No restriction               | Illumina        | McPherson et al., PLoS Comput Biol. (2011a)                             |
| <b>SnowShoes-FTD</b>  | Within exon boundary         | Illumina        | Asmann et al., Nucleic Acids Res. (2011)                                |
| <b>chimerascan</b>    | No restriction               | Illumina        | Iyer et al., Bioinformatics. (2011)                                     |
| <b>FusionCatcher</b>  | No restriction               | Illumina/SOLiD  | Edgren et al., Genome Biol. (2011),<br>Nicorici et al., bioRxiv. (2014) |
| <b>TopHat-Fusion</b>  | No restriction               | Illumina        | Kim et al., Genome Biol. (2011)                                         |
| <b>BreakFusion</b>    | No restriction               | Illumina        | Chen et al., Bioinformatics. (2012)                                     |
| <b>FusionAnalyser</b> | Within exon boundary         | Illumina        | Piazza et al., Nucleic Acids Res. (2012)                                |
| <b>LifeScope</b>      |                              | SOLiD           | Sakarya et al., PLoS Comput Biol. (2012)                                |
| <b>Bellerophontes</b> | No restriction               | Illumina        | Abate et al., Bioinformatics. (2012)                                    |
| <b>FusionFinder</b>   | Within exon boundary         | Illumina        | Francis et al., PLoS One. (2012)                                        |
| <b>EricScript</b>     | Within exon or exon boundary | Illumina        | Benelli et al., Bioinformatics. (2012)                                  |
| <b>SOAPfuse</b>       | No restriction               | Illumina        | Jai et al., Genome Biol. (2013)                                         |
| <b>FusionQ</b>        | No restriction               | Illumina/SOLiD  | Liu et al., BMC Bioinformatics. (2013)                                  |
| <b>SOAPfusion</b>     | Within exon or exon boundary | Illumina        | Wu et al., Bioinformatics. (2013)                                       |
| <b>PRADA</b>          | Within exon boundary         | Illumina        | Torres-Garcia et al., Bioinformatics. (2014)                            |
| <b>JAFFA</b>          | Within exon or exon boundary | Illumina        | Davidson et al., Genome Medicine. (2015)                                |

**Table S2.** Description of fifteen fusion detection tools and their default (or available) detection and filtering parameters.

| Tool (version)                    | Anchor length filter | Read-through transcript filter | Supported reads filter (spanning / split) | PCR artifact filter | Homology based filter | Alignment tools          | Assembly (#) / Machine learning (o) | Fusion transcript database information | Description of installation                                         |
|-----------------------------------|----------------------|--------------------------------|-------------------------------------------|---------------------|-----------------------|--------------------------|-------------------------------------|----------------------------------------|---------------------------------------------------------------------|
| <b>MapSplice (V 2.1.9)</b>        | N                    | N                              | N                                         | N                   | N                     | bowtie                   | N                                   | N                                      | Python script. Easy to install.                                     |
| <b>ShortFuse (V 0.2)</b>          | N                    | N                              | Y                                         | N                   | N                     | bowtie                   | N                                   | Y                                      | C++ script. Easy to install.                                        |
| <b>FusionHunter (V 1.4)</b>       | 10                   | Y                              | 3/1                                       | Y                   | Y                     | bowtie                   | N                                   | Y                                      | Perl script. Easy to install.                                       |
| <b>FusionMap (V 2015-03-31)</b>   | Y*                   | Y                              | Y<br>(different definition)               | Y                   | Y                     | N                        | o (GSNAP)                           | Y                                      | Executable file. Easy to install.                                   |
| <b>deFuse (V 0.6.2)</b>           | 10                   | Y                              | 3/1                                       | N                   | Y                     | bowtie/BLAT              | N                                   | N                                      | C++ script. Easy to install.                                        |
| <b>chimerascan (V 0.4.5)</b>      | 10                   | Y                              | 4 (total)                                 | N                   | N                     | bowtie/BWA               | N                                   | Y                                      | Python script. Easy to install.                                     |
| <b>FusionCatcher (V 0.99.4b)</b>  | 10                   | Y                              | 3/1                                       | N                   | Y                     | bowtie/STAR/BLAT/bowtie2 | # (velvet)                          | Y                                      | Python script. easy to install and need to construct database       |
| <b>TopHat - Fusion (V 2.0.14)</b> | 10                   | Y                              | 3/1                                       | N                   | Y                     | bowtie                   | N                                   | Y                                      | Python script. Easy to install.                                     |
| <b>BreakFusion (V 1.0.1)</b>      | N                    | N                              | N                                         | N                   | N                     | BWA/BLAT                 | # (TIGRA-SV)                        | N                                      | Need to install several supporting tools.                           |
| <b>EricScript (V 0.5.1)</b>       | N                    | Y                              | 3/1 (self filter)                         | Y                   | Y                     | BWA/BLAT                 | o                                   | N                                      | Perl and R script. Easy to install.                                 |
| <b>SOAPfuse (V 1.26)</b>          | 10                   | N                              | 3/1                                       | N                   | N                     | Soap2/BWA/BLAT           | N                                   | N                                      | Perl script. Easy to install and database is available.             |
| <b>FusionQ (V 5)</b>              | 10                   | N                              | 3/1                                       | N                   | Y                     | bowtie                   | # (TIGRA-SV)                        | N                                      | Perl script.                                                        |
| <b>SnowShoes-FTD (V 2.0)</b>      | N                    | Y                              | 2/N                                       | Y                   | Y                     | bowtie/BWA               | N                                   | Y                                      | Perl script. Easy to install. Reference for different read lengths. |
| <b>PRADA (V1.1)</b>               | N                    | N                              | N                                         | N                   | N                     | BWA/BLAST                | N                                   | N                                      | Python script. Easy to install.                                     |
| <b>JAFFA (V1.06)</b>              | N                    | Y                              | 3/1 (self filter)                         | N                   | Y                     | bowtie2/BLAT             | N                                   | N                                      | Java script (groovy). Easy to install.                              |

\* FusionMap Anchor length filter: Min(25, Max(17, floor (Read-Length/3)))

**Table S3.** 150 designed fusions in the synthetic data.

| Gene1ID         | Gene2ID         | Gene1Name | Gene2Name |
|-----------------|-----------------|-----------|-----------|
| ENSG00000008282 | ENSG00000075790 | SYPL1     | BCAP29    |
| ENSG00000011405 | ENSG00000244165 | PIK3C2A   | P2RY11    |
| ENSG00000022556 | ENSG00000100504 | NLRP2     | PYGL      |
| ENSG00000028310 | ENSG00000173273 | BRD9      | TNKS      |
| ENSG00000055609 | ENSG00000100364 | MLL3      | KIAA0930  |
| ENSG00000062038 | ENSG00000044115 | CDH3      | CTNNA1    |
| ENSG00000069493 | ENSG00000102024 | CLEC2D    | PLS3      |
| ENSG00000070501 | ENSG00000196873 | POLB      | CBWD3     |
| ENSG00000072041 | ENSG00000182944 | SLC6A15   | EWSR1     |
| ENSG00000077549 | ENSG00000143549 | CAPZB     | TPM3      |
| ENSG00000084710 | ENSG00000026103 | EFR3B     | FAS       |
| ENSG00000095539 | ENSG00000181090 | SEMA4G    | EHMT1     |
| ENSG00000100239 | ENSG00000105810 | PPP6R2    | CDK6      |
| ENSG00000100744 | ENSG00000142541 | C14orf129 | RPL13A    |
| ENSG00000101138 | ENSG00000115946 | CSTF1     | PNO1      |
| ENSG00000101945 | ENSG00000116703 | SUV39H1   | PDC       |
| ENSG00000105568 | ENSG00000126070 | PPP2R1A   | EIF2C3    |
| ENSG00000106991 | ENSG00000105856 | ENG       | HBP1      |
| ENSG00000109072 | ENSG00000139372 | SEBOX     | TDG       |
| ENSG00000110786 | ENSG00000146013 | PTPN5     | GFRA3     |
| ENSG00000112414 | ENSG00000100276 | GPR126    | RASL10A   |
| ENSG00000114120 | ENSG00000171307 | SLC25A36  | ZDHHC16   |
| ENSG00000114626 | ENSG00000169439 | ABTB1     | SDC2      |
| ENSG00000115392 | ENSG00000173614 | FANCL     | NMNAT1    |
| ENSG00000115935 | ENSG00000163430 | WIPF1     | FSTL1     |
| ENSG00000115966 | ENSG00000115446 | ATF2      | UNC50     |
| ENSG00000116809 | ENSG00000140577 | ZBTB17    | CRTC3     |
| ENSG00000118557 | ENSG00000051382 | PMFBP1    | PIK3CB    |
| ENSG00000119139 | ENSG00000188554 | TJP2      | NBR1      |
| ENSG00000119772 | ENSG00000130640 | DNMT3A    | TUBGCP2   |
| ENSG00000121577 | ENSG00000205981 | POPDC2    | DNAJC19   |
| ENSG00000124596 | ENSG00000198363 | C6orf130  | ASPH      |
| ENSG00000125122 | ENSG00000186231 | LRRC29    | KLHL32    |
| ENSG00000125630 | ENSG00000119535 | POLR1B    | CSF3R     |
| ENSG00000128512 | ENSG00000186952 | DOCK4     | TMEM232   |
| ENSG00000130038 | ENSG00000150527 | EFCAB4B   | CTAGE5    |
| ENSG00000130844 | ENSG00000104325 | ZNF331    | DECR1     |
| ENSG00000132321 | ENSG00000170236 | IQCA1     | USP50     |
| ENSG00000132323 | ENSG00000173715 | ILKAP     | C11orf80  |
| ENSG00000134375 | ENSG00000140854 | TIMM17A   | KATNB1    |
| ENSG00000135269 | ENSG00000134940 | TES       | ACRV1     |

|                  |                 |           |           |
|------------------|-----------------|-----------|-----------|
| ENSG00000136541  | ENSG00000048740 | ERMN      | CELF2     |
| ENSG00000136546  | ENSG00000171109 | SCN7A     | MFN1      |
| ENSG00000137404  | ENSG00000184708 | NRM       | EIF4ENIF1 |
| ENSG00000142494  | ENSG00000164941 | SLC47A1   | INTS8     |
| ENSG00000146263  | ENSG00000158552 | MMS22L    | ZFAND2B   |
| ENSG00000146909  | ENSG00000174236 | NOM1      | REP15     |
| ENSG00000147044  | ENSG00000185305 | CASK      | ARL15     |
| ENSG00000148296  | ENSG00000123700 | SURF6     | KCNJ2     |
| ENSG00000151726  | ENSG00000012048 | ACSL1     | BRCA1     |
| ENSG00000154556  | ENSG00000143774 | SORBS2    | GUK1      |
| ENSG00000156502  | ENSG00000106686 | SUPV3L1   | SPATA6L   |
| ENSG00000157600  | ENSG00000108961 | TMEM164   | RANGRF    |
| ENSG00000157601  | ENSG00000124181 | MX1       | PLCG1     |
| ENSG00000158055  | ENSG00000160310 | GRHL3     | PRMT2     |
| ENSG00000161835  | ENSG00000165138 | GRASP     | ANKS6     |
| ENSG00000162174  | ENSG00000104936 | ASRGL1    | DMPK      |
| ENSG00000163281  | ENSG00000164896 | GNPDA2    | FASTK     |
| ENSG00000165219  | ENSG00000148660 | GAPVD1    | CAMK2G    |
| ENSG00000165275  | ENSG00000153029 | TRMT10B   | MR1       |
| ENSG00000165802  | ENSG00000137207 | NELF      | YIPF3     |
| ENSG00000166333  | ENSG00000129219 | ILK       | PLD2      |
| ENSG00000167822  | ENSG00000164032 | OR8J3     | H2AFZ     |
| ENSG00000168000  | ENSG00000141564 | BSCL2     | RPTOR     |
| ENSG00000168214  | ENSG00000149571 | RBPJ      | KIRREL3   |
| ENSG00000170525  | ENSG00000188859 | PFKFB3    | FAM78B    |
| ENSG00000171055  | ENSG00000183474 | FEZ2      | GTF2H2C   |
| ENSG00000172939  | ENSG00000169239 | OXSRI     | CA5B      |
| ENSG00000173482  | ENSG00000156990 | PTPRM     | RPUSD3    |
| ENSG00000173638  | ENSG00000139233 | SLC19A1   | LLPH      |
| ENSG00000175691  | ENSG00000120910 | ZNF77     | PPP3CC    |
| ENSG00000178882  | ENSG00000165799 | FAM101A   | RNASE7    |
| ENSG00000186431  | ENSG00000048828 | FCAR      | FAM120A   |
| ENSG00000186523  | ENSG00000154429 | FAM86B1   | CCSAP     |
| ENSG00000188493  | ENSG00000182934 | C19orf54  | SRPR      |
| ENSG00000196104  | ENSG00000185627 | SPOCK3    | PSMD13    |
| ENSG00000203685  | ENSG00000148426 | C1orf95   | C10orf47  |
| ENSG00000205327  | ENSG00000256061 | OR6C68    | DYX1C1    |
| ENSG00000215454  | ENSG00000100918 | KRTAP10-4 | REC8      |
| ENSG00000255501  | ENSG00000001084 | CARD18    | GCLC      |
| ENSG00000007264  | ENSG00000122642 | MATK      | FKBP9     |
| ENSG00000007350  | ENSG00000137501 | TKTL1     | SYTL2     |
| ENSG000000011347 | ENSG00000136247 | SYT7      | ZDHHC4    |
| ENSG000000015133 | ENSG00000205583 | CCDC88C   | STAG3L1   |

|                 |                 |          |          |
|-----------------|-----------------|----------|----------|
| ENSG00000037474 | ENSG00000189308 | NSUN2    | LIN54    |
| ENSG00000065150 | ENSG00000110077 | IPO5     | MS4A6A   |
| ENSG00000074319 | ENSG00000082516 | TSG101   | GEMIN5   |
| ENSG00000078618 | ENSG00000076554 | NRD1     | TPD52    |
| ENSG00000085377 | ENSG00000196642 | PREP     | RABL6    |
| ENSG00000087460 | ENSG00000140299 | GNAS     | BNIP2    |
| ENSG00000092421 | ENSG00000167173 | SEMA6A   | C15orf39 |
| ENSG00000102125 | ENSG00000049618 | TAZ      | ARID1B   |
| ENSG00000102243 | ENSG00000102271 | VGLL1    | KLHL4    |
| ENSG00000103363 | ENSG00000172366 | TCEB2    | FAM195A  |
| ENSG00000103591 | ENSG00000075426 | AAGAB    | FOSL2    |
| ENSG00000109339 | ENSG00000179698 | MAPK10   | KIAA1875 |
| ENSG00000111271 | ENSG00000174175 | ACAD10   | SELP     |
| ENSG00000112624 | ENSG00000107438 | KIAA0240 | PDLIM1   |
| ENSG00000116254 | ENSG00000083454 | CHD5     | P2RX5    |
| ENSG00000116761 | ENSG00000116830 | CTH      | TTF2     |
| ENSG00000118729 | ENSG00000113312 | CASQ2    | TTC1     |
| ENSG00000118997 | ENSG00000151779 | DNAH7    | NBAS     |
| ENSG00000119042 | ENSG00000137948 | SATB2    | BRDT     |
| ENSG00000119844 | ENSG00000152413 | AFTPH    | HOMER1   |
| ENSG00000119986 | ENSG00000115685 | AVP11    | PPP1R7   |
| ENSG00000122145 | ENSG00000127993 | TBX22    | RBM48    |
| ENSG00000122741 | ENSG00000102359 | DCAF10   | SRPX2    |
| ENSG00000123552 | ENSG00000106078 | USP45    | COBL     |
| ENSG00000126107 | ENSG00000013288 | HECTD3   | MAN2B2   |
| ENSG00000130787 | ENSG00000002726 | HIP1R    | ABP1     |
| ENSG00000133026 | ENSG00000163328 | MYH10    | GPR155   |
| ENSG00000133985 | ENSG00000181135 | TTC9     | ZNF707   |
| ENSG00000134324 | ENSG00000088305 | LPIN1    | DNMT3B   |
| ENSG00000134343 | ENSG00000101158 | ANO3     | TH1L     |
| ENSG00000134627 | ENSG00000204580 | PIWIL4   | DDR1     |
| ENSG00000137070 | ENSG00000088298 | IL11RA   | EDEM2    |
| ENSG00000138069 | ENSG00000144908 | RAB1A    | ALDH1L1  |
| ENSG00000138386 | ENSG00000158639 | NAB1     | PAGE5    |
| ENSG00000138395 | ENSG00000123130 | CDK15    | ACOT9    |
| ENSG00000140285 | ENSG00000100353 | FGF7     | EIF3D    |
| ENSG00000144820 | ENSG00000108292 | GPR128   | MLLT6    |
| ENSG00000146828 | ENSG00000168275 | SLC12A9  | C1orf31  |
| ENSG00000147133 | ENSG00000127989 | TAF1     | MTERF    |
| ENSG00000149636 | ENSG00000134453 | DSN1     | RBM17    |
| ENSG00000150477 | ENSG00000075914 | KIAA1328 | EXOSC7   |
| ENSG00000150995 | ENSG00000142920 | ITPR1    | ADC      |
| ENSG00000151136 | ENSG00000177106 | BTBD11   | EPS8L2   |

|                 |                 |         |          |
|-----------------|-----------------|---------|----------|
| ENSG00000154134 | ENSG00000131503 | ROBO3   | ANKHD1   |
| ENSG00000160867 | ENSG00000134986 | FGFR4   | NREP     |
| ENSG00000162909 | ENSG00000168569 | CAPN2   | TMEM223  |
| ENSG00000163541 | ENSG00000163166 | SUCLG1  | IWS1     |
| ENSG00000168509 | ENSG00000102158 | HFE2    | MAGT1    |
| ENSG00000169230 | ENSG00000158517 | PRELID1 | NCF1     |
| ENSG00000169914 | ENSG00000173077 | OTUD3   | l-Dec    |
| ENSG00000170166 | ENSG00000092203 | HOXD4   | TOX4     |
| ENSG00000172007 | ENSG00000141540 | RAB33B  | TTYH2    |
| ENSG00000174899 | ENSG00000139182 | C3orf55 | CLSTN3   |
| ENSG00000176641 | ENSG00000148985 | RNF152  | PGAP2    |
| ENSG00000177311 | ENSG00000164129 | ZBTB38  | NPY5R    |
| ENSG00000183963 | ENSG00000153237 | SMTN    | CCDC148  |
| ENSG00000184497 | ENSG00000099204 | FAM70B  | ABLIM1   |
| ENSG00000185189 | ENSG00000239713 | NRBP2   | APOBEC3G |
| ENSG00000185303 | ENSG00000125676 | SFTPA2  | THOC2    |
| ENSG00000188282 | ENSG00000162191 | RUFY4   | UBXN1    |
| ENSG00000188343 | ENSG00000104824 | FAM92A1 | HNRNPL   |
| ENSG00000189157 | ENSG00000073417 | FAM47E  | PDE8A    |
| ENSG00000197561 | ENSG00000125944 | ELANE   | HNRNPR   |
| ENSG00000198130 | ENSG00000166428 | HIBCH   | PLD4     |
| ENSG00000205726 | ENSG00000188130 | ITSN1   | MAPK12   |
| ENSG00000239857 | ENSG00000180822 | GET4    | PSMG4    |

**Table S4.** The read numbers of type-1A and type-1B synthetic datasets.

| Coverage | 50 bp   | 75 bp   | 100 bp  |
|----------|---------|---------|---------|
| 5X       | 16,832  | 11,221  | 8,416   |
| 20X      | 67,328  | 44,885  | 33,664  |
| 50X      | 168,320 | 112,213 | 84,160  |
| 100X     | 336,641 | 224,427 | 168,320 |
| 200X     | 673,282 | 448,854 | 336,641 |

**Table S5.** Details for type-2, type-3A and type-3B synthetic datasets: (A) read numbers; (B) insert sizes.

**A**

| Type    | Composition                 | 50 bp     | 75 bp     | 100 bp    |
|---------|-----------------------------|-----------|-----------|-----------|
| Type-2  | Background data*            | 2,000,000 | 2,000,000 | 2,000,000 |
| Type-3A | Synthetic data              | 336,641   | 224,426   | 168,284   |
| Type-3B | Synthetic + Background data | 2,336,641 | 2,224,426 | 2,168,284 |

\*Background data are the real tissue data: lung, parathyroid, skeletal myocyte, bladder and T cell sample respectively.

**B**

| Tissue           | SRA ID*    | Insert size mean value | Insert size SD value |
|------------------|------------|------------------------|----------------------|
| Lung             | SRR349695  | 164 bp                 | 48 bp                |
| Parathyroid      | SRR479053  | 192 bp                 | 85 bp                |
| Skeletal myocyte | SRR1693845 | 353 bp                 | 116 bp               |
| Bladder          | SRR400342  | 248 bp                 | 26 bp                |
| T cell           | SRR1909130 | 290 bp                 | 120 bp               |

\*SRA: Sequence Read Archive (<http://www.ncbi.nlm.nih.gov/sra>)

**Table S6.** Data description for three real datasets.

| Cancer                               | Sample  | Read length (bp) | Insert size* (bp) | Read number                                      | Validated fusions                                                                                                                                                     |
|--------------------------------------|---------|------------------|-------------------|--------------------------------------------------|-----------------------------------------------------------------------------------------------------------------------------------------------------------------------|
| Breast Cancer (Edgren, et al., 2011) | BT474   | 50               | 180 ± 80          | 21,423,697                                       | ACACA - STAC2, RPS6KB1 - SNF8, VAPB - IKZF3, ZMYND8 - CEP250, RAB22A - MYO9B, SKA2 - MYO19, DIDO1 - KIAA0406, STARD3 - DOK5, LAMP1 - MCF2L, GLB1 - CMTM7, CPNE1 - PI3 |
|                                      | KPL4    | 50               | 180 ± 80          | 6,796,443                                        | BSG - NFIX, PPP1R12A - SEPT10, NOTCH1 - NUP214,                                                                                                                       |
|                                      | MCF7    | 50               | 180 ± 80          | 8,409,785                                        | BCAS4 - BCAS3, ARFGF2 - SULF2, PRPS6KB1 - TMEM49                                                                                                                      |
|                                      | SKBR3   | 50               | 180 ± 80          | 18,140,246                                       | TATDN1 - GSDMB, CSE1L - ENSG00000236127, RARA - PKIA, ANKHD1 - PCDH1, CCDC85C - SETD3, SUMF1 - LRRFIP2, WDR67 - ZNF704, CYTH1 - EIF3H, DHX35 - ITCH, NFS1 - PREX1     |
| Melanoma (Berger, et al., 2010)      | 501Mel  | 50               | 351 ± 139         | 14,857,046                                       | CCT3 - C1orf61, GNA12 - SHANK2, SLC12A7 - C11orf67, PARP1 - MIXL1                                                                                                     |
|                                      | M000216 | 50               | 393 ± 115         | 13,868,165                                       | KCTD2 - ARHGEF12                                                                                                                                                      |
|                                      | M000921 | 50               | 627 ± 564         | 14,468,771                                       | TMEM8B - TLN1, RECK - ALX3                                                                                                                                            |
|                                      | M010403 | 50               | 374 ± 159         | 8,168,750                                        | SCAMP2 - WDR72                                                                                                                                                        |
|                                      | M980409 | 50               | 334 ± 119         | 15,768,555                                       | GCN1L1 - PLA2G1B                                                                                                                                                      |
| M990802                              | 50      | 355 ± 125        | 16,066,999        | ANKHD1 - C5orf32, RB1 - ITM2B                    |                                                                                                                                                                       |
| Prostate Cancer (Yu, et al., 2014)   | 158T    | 100              | 140 ± 27          | 221,206,388                                      | SLC45A3 - ELK4, MTOR - TP53BP1                                                                                                                                        |
|                                      | 159T    | 100              | 153 ± 33          | 159,766,465                                      | TRMT11 - GRIK2, MAN2A1 - FER, KDM4B - AC011523.2, CCNH - C5orf30                                                                                                      |
|                                      | 165T    | 100              | 158 ± 40          | 243,191,643                                      | SLC45A3 - ELK4, TMEM135 - CCDC67                                                                                                                                      |
|                                      | 171T    | 100              | 143 ± 30          | 118,742,381                                      | TMPRSS2 - ERG                                                                                                                                                         |
| 49T                                  | 100     | 158 ± 37         | 250,071,864       | SLC45A3 - ELK4, TMPRSS2 - ERG, LRRC59 - SLC22A10 |                                                                                                                                                                       |

\*Insert size is estimated by alignment tool BWA.

**Table S7.** Parameter setting for TopHat-Fusion.

| Options                          | Explanation                                     |
|----------------------------------|-------------------------------------------------|
| --no-coverage-search             | Disable the coverage based search for junctions |
| --fusion-min-dist 1000000        | Default minimum distance                        |
| --fusion-ignore-chromosomes chrM | Ignore chromosome M                             |

\*We use bowtie2 hg19 index in TopHat step, and use both bowtie and bowtie2 hg19 index in the Fusion step.

**Table S8.** Parameter setting for anchor length and spanning/split reads of all the fifteen tools.

| Detection tools      | Anchor length                         | Spanning read       | Split read          | Note                                                   |
|----------------------|---------------------------------------|---------------------|---------------------|--------------------------------------------------------|
| <b>MapSplice</b>     | -                                     | -                   | -                   | User self-filter for spanning+split as 4               |
| <b>ShortFuse</b>     | -                                     | -                   | -                   | A score to rank the detected fusion transcripts        |
| <b>FusionHunter</b>  | 10                                    | 3                   | 1                   |                                                        |
| <b>FusionMap</b>     | Min(25, Max(17, floor(ReadLength/3))) | Distinct definition | Distinct definition |                                                        |
| <b>deFuse</b>        | 10                                    | 3                   | 1                   |                                                        |
| <b>chimerascan</b>   | 10                                    | -                   | -                   | Set spanning+split as 4; maximum mismatch is 3         |
| <b>FusionCatcher</b> | 10                                    | 3                   | 1                   |                                                        |
| <b>TopHat-Fusion</b> | 10                                    | 3                   | 1                   |                                                        |
| <b>BreakFusion</b>   | -                                     | -                   | -                   | User self-filter for spanning+split as 4               |
| <b>EricScript</b>    | -                                     | -                   | -                   | User self-filter for spanning/split read on the output |
| <b>SOAPfuse</b>      | 10                                    | 3                   | 1                   |                                                        |
| <b>FusionQ</b>       | 10                                    | 3                   | 1                   |                                                        |
| <b>PRADA</b>         | -                                     | -                   | -                   | User self-filter for spanning+split as 4               |
| <b>SnowShoes-FTD</b> | -                                     | -                   | -                   | Set spanning+split as 4                                |
| <b>JAFFA</b>         | -                                     | 3                   | 1                   | User self-filter for spanning/split read on the output |

\*Otherwise default settings are used for the other parameters.

**Table S9.** Completeness of the fifteen tools on the synthetic and real datasets.

| Tools         | Type-1 synthetic dataset | Type-2 synthetic dataset     | Type-3 synthetic dataset          | Breast cancer dataset              | Melanoma dataset | Prostate dataset | Validation dataset | Note                                                       |
|---------------|--------------------------|------------------------------|-----------------------------------|------------------------------------|------------------|------------------|--------------------|------------------------------------------------------------|
| MapSplice     | Y                        | Y                            | Y                                 | Y                                  | Y                | 49T failed       | Y                  | Running time exceed 14 days and larger than 2TB temp files |
| ShortFuse     | 100 bp data failed       | 75 bp and 100 bp data failed | 0 output for most of the datasets | Y                                  | Y                | failed           | failed             | Error with 'parsing the discordant reads'                  |
| FusionHunter  | failed                   | failed                       | failed                            | Y                                  | Y                | Y                | Y                  | Stack smashing for synthetic data                          |
| FusionMap     | Y                        | Y                            | Y                                 | Y                                  | Y                | Y                |                    |                                                            |
| deFuse        | Y                        | Y                            | Y                                 | Y                                  | Y                | failed           | 0 output           | Running time exceed 14 days                                |
| chimerascan   | Y                        | Y                            | Y                                 | Y                                  | Y                | Y                | Y                  |                                                            |
| FusionCatcher | Y                        | Y                            | Y                                 | Y                                  | Y                | Y                | Y                  |                                                            |
| Tophat-Fusion | Y                        | Y                            | Y                                 | Y                                  | Y                | Y                | Y                  | Changing parameter setting                                 |
| BreakFusion   | Y                        | Y                            | Y                                 | Y                                  | Y                | Y                | Y                  |                                                            |
| Ericscript    | Y                        | Y                            | Y                                 | Y                                  | Y                | 0 output         | Y                  |                                                            |
| SOAPfuse      | Y                        | Y                            | Y                                 | Y                                  | Y                | Y                | Y                  |                                                            |
| FusionQ       | Y                        | Y                            | Y                                 | Partially could not complete (CNC) | CNC              | CNC              | 0 output           | Tool cannot stop at 3 <sup>rd</sup> step if data are large |
| PRADA         | Y                        | Y                            | Y                                 | Y                                  | Y                | Y                | Y                  |                                                            |
| SnowShoes-FTD | Y                        | Y                            | Y                                 | Y                                  | Y                | Y                | Y                  | Trim 100 bp reads to 50 bp                                 |
| JAFFA         | Y                        | Y                            | Y                                 | Y                                  | Y                | Y                | Y                  |                                                            |

**Table S10.** The read numbers of prostate cancer 171T dataset and its subsamples.

| Subsample | Read numbers |
|-----------|--------------|
| 1/1       | 118,742,381  |
| 1/2       | 59,371,192   |
| 1/4       | 29,685,596   |
| 1/8       | 14,842,798   |



**Table S11.** The summary of the recall rates, precision rates and F-measures for three representative synthetic data: (A) type-1A with read 100 bp & 100X, (B) type-1B with read 100 bp & 100X, and (C) type-3B lung sample with read 50 bp & 100X.

| <b>A</b>        |     |    |     |       |        |           |           |
|-----------------|-----|----|-----|-------|--------|-----------|-----------|
| Detection tools | TP  | FP | FN  | TP+FP | Recall | Precision | F-measure |
| SOAPfuse        | 139 | 26 | 11  | 165   | 0.927  | 0.842     | 0.882     |
| FusionCatcher   | 108 | 20 | 42  | 128   | 0.720  | 0.844     | 0.777     |
| JAFFA           | 88  | 16 | 62  | 104   | 0.587  | 0.846     | 0.693     |
| EricScript      | 104 | 13 | 46  | 117   | 0.693  | 0.889     | 0.779     |
| chimerascan     | 105 | 30 | 45  | 135   | 0.700  | 0.778     | 0.737     |
| PRADA           | 57  | 2  | 93  | 59    | 0.380  | 0.966     | 0.545     |
| deFuse          | 73  | 9  | 77  | 82    | 0.487  | 0.890     | 0.630     |
| FusionMap       | 92  | 27 | 58  | 119   | 0.613  | 0.773     | 0.684     |
| TopHat-Fusion   | 53  | 14 | 97  | 67    | 0.353  | 0.791     | 0.488     |
| MapSplice       | 51  | 8  | 99  | 59    | 0.340  | 0.864     | 0.488     |
| BreakFusion     | 106 | 44 | 44  | 150   | 0.707  | 0.707     | 0.707     |
| SnowShoes-FTD   | 3   | 1  | 147 | 4     | 0.020  | 0.750     | 0.039     |
| FusionQ         | 81  | 18 | 69  | 99    | 0.540  | 0.818     | 0.651     |
| FusionHunter    | -   | -  | -   | -     | -      | -         | -         |
| ShortFuse       | -   | -  | -   | -     | -      | -         | -         |

  

| <b>B</b>        |     |    |     |       |        |           |           |
|-----------------|-----|----|-----|-------|--------|-----------|-----------|
| Detection tools | TP  | FP | FN  | TP+FP | Recall | Precision | F-measure |
| SOAPfuse        | 136 | 22 | 14  | 158   | 0.907  | 0.861     | 0.883     |
| FusionCatcher   | 110 | 18 | 40  | 128   | 0.733  | 0.859     | 0.791     |
| JAFFA           | 86  | 20 | 64  | 106   | 0.573  | 0.811     | 0.672     |
| EricScript      | 111 | 15 | 39  | 126   | 0.740  | 0.881     | 0.804     |
| chimerascan     | 96  | 26 | 54  | 122   | 0.640  | 0.787     | 0.706     |
| PRADA           | 57  | 3  | 93  | 60    | 0.380  | 0.950     | 0.543     |
| deFuse          | 123 | 15 | 27  | 138   | 0.820  | 0.891     | 0.854     |
| FusionMap       | 95  | 22 | 55  | 117   | 0.633  | 0.812     | 0.711     |
| TopHat-Fusion   | 64  | 16 | 86  | 80    | 0.427  | 0.800     | 0.557     |
| MapSplice       | 53  | 9  | 97  | 62    | 0.353  | 0.855     | 0.500     |
| BreakFusion     | 74  | 36 | 76  | 110   | 0.493  | 0.673     | 0.569     |
| SnowShoes-FTD   | 3   | 1  | 147 | 4     | 0.020  | 0.750     | 0.039     |
| FusionQ         | 51  | 12 | 99  | 63    | 0.340  | 0.810     | 0.479     |
| FusionHunter    | -   | -  | -   | -     | -      | -         | -         |
| ShortFuse       | -   | -  | -   | -     | -      | -         | -         |

  

| <b>C</b>        |     |     |     |       |        |           |           |
|-----------------|-----|-----|-----|-------|--------|-----------|-----------|
| Detection tools | TP  | FP  | FN  | TP+FP | Recall | Precision | F-measure |
| SOAPfuse        | 138 | 27  | 12  | 165   | 0.920  | 0.836     | 0.876     |
| FusionCatcher   | 102 | 19  | 48  | 121   | 0.680  | 0.843     | 0.753     |
| JAFFA           | 88  | 12  | 62  | 100   | 0.587  | 0.880     | 0.704     |
| EricScript      | 105 | 15  | 45  | 120   | 0.700  | 0.875     | 0.778     |
| chimerascan     | 91  | 25  | 59  | 116   | 0.607  | 0.784     | 0.684     |
| PRADA           | 55  | 2   | 95  | 57    | 0.367  | 0.965     | 0.532     |
| deFuse          | 43  | 7   | 107 | 50    | 0.287  | 0.860     | 0.430     |
| FusionMap       | 72  | 11  | 78  | 83    | 0.480  | 0.867     | 0.618     |
| TopHat-Fusion   | 66  | 19  | 84  | 85    | 0.440  | 0.776     | 0.562     |
| MapSplice       | 55  | 9   | 95  | 64    | 0.367  | 0.859     | 0.514     |
| BreakFusion     | 114 | 141 | 36  | 255   | 0.760  | 0.447     | 0.563     |
| SnowShoes-FTD   | 3   | 1   | 147 | 4     | 0.020  | 0.750     | 0.039     |
| FusionQ         | 37  | 37  | 113 | 74    | 0.247  | 0.500     | 0.331     |
| FusionHunter    | -   | -   | -   | -     | -      | -         | -         |
| ShortFuse       | -   | -   | -   | -     | -      | -         | -         |

**Table S12.** The correlation between five normal tissues by the F-measure of the fifteen tools on the type-3B dataset.

|                  | Lung | Parathyroid | Bladder | Skeletal myocyte | T cell |
|------------------|------|-------------|---------|------------------|--------|
| Lung             | 1    | 0.95        | 0.78    | 0.94             | 0.92   |
| Parathyroid      | -    | 1           | 0.79    | 0.99             | 0.79   |
| Bladder          | -    | -           | 1       | 0.87             | 0.56   |
| Skeletal myocyte | -    | -           | -       | 1                | 0.76   |
| T cell           | -    | -           | -       | -                | 1      |

**Table S13.** The summary of the recall rates, precision rates and F-measures for three real datasets (pool samples together): (A) breast cancer data; (B) melanoma data; (C) prostate cancer data.**A**

| Detection tools | TP | FP   | FN | TP+FP | Recall | Precision | F-measure |
|-----------------|----|------|----|-------|--------|-----------|-----------|
| SOAPfuse        | 20 | 48   | 7  | 68    | 0.741  | 0.294     | 0.421     |
| FusionCatcher   | 19 | 48   | 8  | 67    | 0.704  | 0.284     | 0.405     |
| JAFFA           | 16 | 16   | 11 | 32    | 0.593  | 0.500     | 0.543     |
| EricScript      | 16 | 67   | 11 | 83    | 0.593  | 0.193     | 0.291     |
| chimerascan     | 19 | 96   | 8  | 115   | 0.704  | 0.165     | 0.267     |
| PRADA           | 15 | 22   | 12 | 37    | 0.556  | 0.405     | 0.469     |
| deFuse          | 19 | 116  | 8  | 135   | 0.704  | 0.141     | 0.235     |
| FusionMap       | 6  | 126  | 21 | 132   | 0.222  | 0.045     | 0.075     |
| TopHat-Fusion   | 15 | 58   | 12 | 73    | 0.556  | 0.205     | 0.300     |
| MapSplice       | 16 | 37   | 11 | 53    | 0.593  | 0.302     | 0.400     |
| BreakFusion     | 15 | 1923 | 12 | 1938  | 0.556  | 0.008     | 0.016     |
| SnowShoes-FTD   | 15 | 5    | 12 | 20    | 0.556  | 0.750     | 0.639     |
| FusionQ         | 4  | 453  | 23 | 457   | 0.148  | 0.009     | 0.017     |
| FusionHunter    | 13 | 10   | 14 | 23    | 0.481  | 0.565     | 0.520     |
| ShortFuse       | 19 | 24   | 8  | 43    | 0.704  | 0.442     | 0.543     |

**B**

| Detection tools | TP | FP   | FN | TP+FP | Recall | Precision | F-measure |
|-----------------|----|------|----|-------|--------|-----------|-----------|
| SOAPfuse        | 10 | 98   | 1  | 108   | 0.909  | 0.093     | 0.169     |
| FusionCatcher   | 3  | 6    | 8  | 9     | 0.273  | 0.333     | 0.300     |
| JAFFA           | 2  | 2    | 9  | 4     | 0.182  | 0.500     | 0.267     |
| EricScript      | 3  | 67   | 8  | 70    | 0.273  | 0.043     | 0.074     |
| chimerascan     | 5  | 189  | 6  | 194   | 0.455  | 0.026     | 0.049     |
| PRADA           | 3  | 4    | 8  | 7     | 0.273  | 0.429     | 0.334     |
| deFuse          | 10 | 189  | 1  | 199   | 0.909  | 0.05      | 0.095     |
| FusionMap       | 2  | 85   | 9  | 87    | 0.182  | 0.023     | 0.041     |
| TopHat-Fusion   | 4  | 25   | 7  | 29    | 0.364  | 0.138     | 0.200     |
| MapSplice       | 5  | 39   | 6  | 44    | 0.455  | 0.114     | 0.182     |
| BreakFusion     | 6  | 3092 | 5  | 3098  | 0.545  | 0.002     | 0.004     |
| SnowShoes-FTD   | 4  | 1    | 7  | 5     | 0.364  | 0.800     | 0.500     |
| FusionQ         | -  | -    | -  | -     | -      | -         | -         |
| FusionHunter    | 4  | 4    | 7  | 8     | 0.364  | 0.500     | 0.421     |
| ShortFuse       | 7  | 30   | 4  | 37    | 0.636  | 0.189     | 0.291     |

## C

| Detection tools | TP | FP   | FN | TP+FP | Recall | Precision | F-measure |
|-----------------|----|------|----|-------|--------|-----------|-----------|
| SOAPfuse        | 7  | 75   | 5  | 82    | 0.583  | 0.085     | 0.148     |
| FusionCatcher   | 11 | 82   | 1  | 93    | 0.917  | 0.118     | 0.209     |
| JAFFA           | 6  | 1815 | 6  | 1821  | 0.500  | 0.003     | 0.006     |
| EricScript      | 11 | 3798 | 1  | 3809  | 0.917  | 0.003     | 0.006     |
| chimerascan     | 8  | 1665 | 4  | 1673  | 0.667  | 0.005     | 0.010     |
| PRADA           | 0  | 13   | 12 | 13    | 0      | 0         | 0         |
| deFuse          | -  | -    | -  | -     | -      | -         | -         |
| FusionMap       | 7  | 3759 | 5  | 3766  | 0.583  | 0.002     | 0.004     |
| TopHat-Fusion   | 0  | 61   | 12 | 61    | 0      | 0         | 0         |
| MapSplice       | 0  | 4    | 12 | 4     | 0      | 0         | 0         |
| BreakFusion     | 1  | 3764 | 11 | 3765  | 0.083  | 0         | 0         |
| SnowShoes-FTD   | 5  | 6    | 7  | 11    | 0.417  | 0.455     | 0.435     |
| FusionQ         | -  | -    | -  | -     | -      | -         | -         |
| FusionHunter    | 0  | 5    | 12 | 5     | 0      | 0         | 0         |
| ShortFuse       | -  | -    | -  | -     | -      | -         | -         |

**Table S14.** The summary of the recall rates, precision rates and F-measures for validation dataset.

| Detection tools | TP | FP  | FN | TP+FP | Recall | Precision | F-measure |
|-----------------|----|-----|----|-------|--------|-----------|-----------|
| SOAPfuse        | 4  | 9   | 5  | 13    | 0.444  | 0.308     | 0.364     |
| FusionCatcher   | 6  | 17  | 3  | 23    | 0.667  | 0.261     | 0.375     |
| JAFFA           | 5  | 8   | 4  | 13    | 0.556  | 0.385     | 0.455     |
| EricScript      | 5  | 358 | 4  | 363   | 0.556  | 0.014     | 0.027     |
| chimerascan     | 6  | 127 | 3  | 133   | 0.667  | 0.045     | 0.084     |
| PRADA           | 3  | 4   | 6  | 7     | 0.333  | 0.429     | 0.375     |
| deFuse          | 0  | 0   | 0  | 0     | 0      | 0         | 0         |
| FusionMap       | 6  | 324 | 3  | 330   | 0.667  | 0.018     | 0.035     |
| TopHat-Fusion   | 1  | 5   | 8  | 6     | 0.111  | 0.167     | 0.133     |
| MapSplice       | 4  | 8   | 5  | 12    | 0.444  | 0.333     | 0.381     |
| BreakFusion     | 2  | 142 | 7  | 144   | 0.222  | 0.014     | 0.026     |
| SnowShoes-FTD   | 4  | 3   | 5  | 7     | 0.444  | 0.571     | 0.5       |
| FusionQ         | 0  | 0   | 0  | 0     | 0      | 0         | 0         |
| FusionHunter    | 2  | 4   | 7  | 6     | 0.222  | 0.333     | 0.266     |
| ShortFuse       | -  | -   | -  | -     | -      | -         | -         |
